# Supplementary material
Source: PubMed Central journal article supplement (PMC2855398)
Supplement: NIHMS166296-supplement-1.pdf [file NIHMS166296-supplement-1.pdf]

## Linker and Primer Sequences for LM-PCR

|           |                                              |
|-----------|----------------------------------------------|
| LL3       | 5'-CGAGTTCAGTCCGTAGACCATGGAGATCTGAATTC-3'    |
| LP2       | 5'-GAATTCAGATCTCC-3'                         |
| LL4       | 5'-CGAGTTCAGTCCGTAGAC-3'                     |
| LL2       | 5'-GTAGACCATGGAGATCTGAAATTC-3'               |
| RET-7     | 5'-BBCAGCATCTTCACGGCCACCGTGG-3' (B, biotin)  |
| RET-R1b   | 5'-TATCCTGCTCTGCCTTTCAGATGG-3'               |
| RET-R1    | 5'-AGTTCTTCCGAGATTCC-3'                      |
| FRA3B-20  | 5'-BBCCTATCTGACGACTTCAC-3' (B, biotin)       |
| FRA3B-9   | 5'-GAAAGCATAAAGTGTGGC-3'                     |
| FRA3B-23  | 5'-TAACTGCTTATTTTTCCGATGT-3'                 |
| 12p12.3-1 | 5'-BBTTTTCTTGACTAGTCTAACCAGAT-3' (B, biotin) |
| 12p12.3-2 | 5'-TTTCACTTGTATTGATCTCCTTCAT-3'              |
| 12.12.3-3 | 5'-TTTCACTGTTTGCCGCATTAT-3'                  |
| G6PDF3    | 5'-BBAGTAAAAACACAAGCCCCGCC-3' (B, biotin)    |
| G6PDF     | 5'-TAGGGCCGCATCCCGCTCCGGAGAGAAGTCT-3'        |
| G6PDF2    | 5'-GGCCACTTTGCAGGGCGTCA-3'                   |

PCR primers for Detection of *RET/PTC* Rearrangements

|                         |                             |
|-------------------------|-----------------------------|
| <i>RET/PTC1</i> forward | 5'-CAAGAGAACAAGGTGCTGAAG-3' |
| <i>RET/PTC3</i> forward | 5'-CGGTATTGTAGCTGTCCCTTC-3' |
| common reverse          | 5'-GCAGGTCTCGAAGCTCACTC-3'  |

<sup>32</sup>P-labeled oligonucleotide probes

|                 |                             |
|-----------------|-----------------------------|
| <i>RET/PTC1</i> | 5'-CGTTACCATCGAGGATCCAAA-3' |
| <i>RET/PTC3</i> | 5'-GAACAGTCAGGAGGTCCAA-3'   |

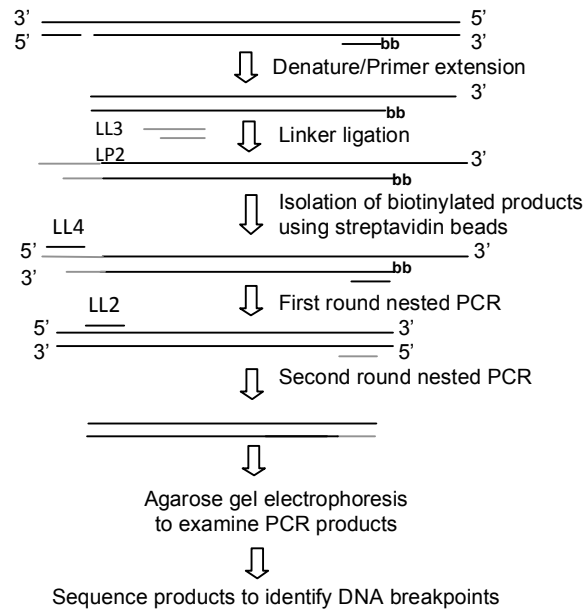

**Supplementary Figure 2.** DNA breaksite mapping by LM-PCR. Genomic DNA was isolated from HTori-3 cells with or without APH treatment, and was denatured and then annealed to a biotinylated primer specific for the region of interest. Primer extension was carried out with DNA Sequenase, and the reaction terminates at a DNA break. DNA breaks were isolated through ligation of the LL3/LP2 linker, and recovered by streptavidin beads. Amplification of these DNA breaks was achieved by nested PCR of the extension-ligation products. The final PCR products were resolved by agarose gel electrophoresis. Each band observed on the gel corresponds to a break found within the region of interest. The exact breakpoint sites were determined by DNA sequencing of the PCR products, and by identifying the nucleotide adjacent to the LL3/LP2 linker sequence.

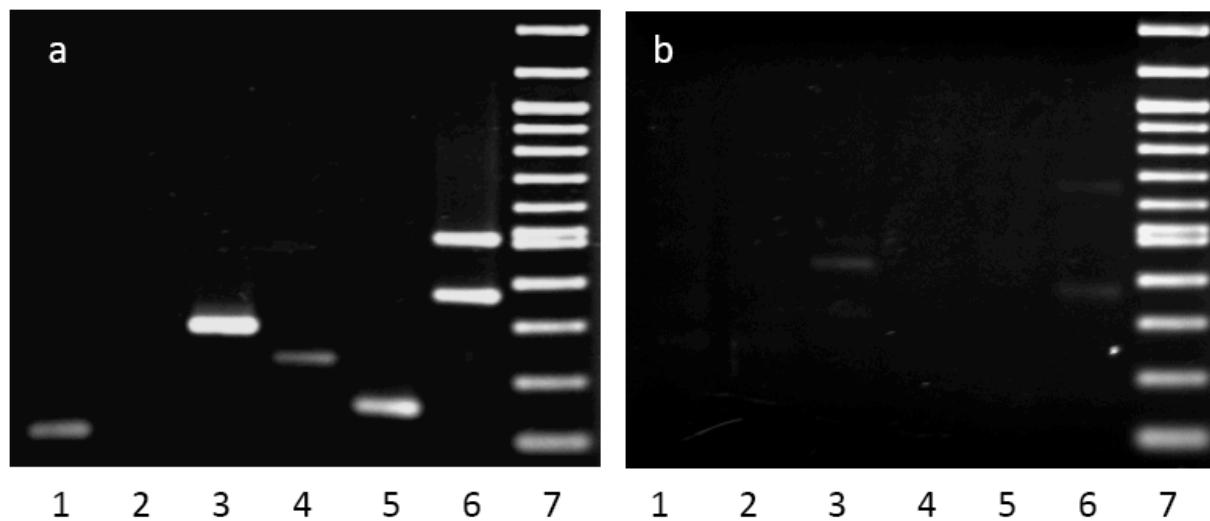

**Supplementary Figure 3.** LM-PCR detection of breaks formed in HTori-3 cells after treatment with APH. LM-PCR detection of DNA breaks formed in HTori-3 cells at intron 11 of *RET* (a) and exon 1 of *G6PD* (b) after treatment with APH. Last lane of each gel is a 100 bp molecular weight ladder.
